# Supplementary material
Source: publisher figshare collection journal article supplement (https://karger.figshare.com/ndownloader/files/29243889)
Supplement: Supplementary file 1 [file 29243889]

**Supplementary Fig.1** Forest plot between the fovea-sparing ILMP group and complete ILMP group in MTM. a Forest plot comparing the preoperative BCVA (logMAR). b Forest plot comparing the preoperative CFT.

**Supplementary Fig.2** Publication bias of the postoperative BCVA (P=0.002) and the proportion of patients with visual improvement (P=0.027).

**Supplementary Fig.3** Trim and fill method for the postoperative BCVA and the proportion of patients with visual improvement.

**Supplementary Fig.4** Sensitivity analysis of the main and secondary outcomes

(a) the rate of postoperative MH formation. CI: confidence interval

(b) postoperative CFT. CI: confidence Interval

(c) postoperative BCVA. CI: confidence interval

(d) preoperative BCVA. CI: confidence interval

(e) preoperative CFT. CI: confidence interval

(f) the improvement of BCVA in logMAR. CI: confidence interval

(g) the proportion of anatomic success. CI: confidence interval

(h) the proportion of patients with visual improvement. CI: confidence interval

(i) the time to resolution. CI: confidence interval
